# Supplementary material for: Diurnal Variation and Twenty-Four Hour Sleep Deprivation Do Not Alter Supine Heart Rate Variability in Healthy Male Young Adults
Source: PLoS One. 2017 Feb 2;12(2):e0170921. doi: 10.1371/journal.pone.0170921 (PMC5289546; doi:10.1371/journal.pone.0170921)
Supplement: S2 Table — (XLSX) [file pone.0170921.s004.xlsx]

## Sheet: Sheet1
Table S2. Hierachical regression model comparisons for morning 2 (sleep deprived group)
		R2	B	SE B	β	P	BF
Alerting
Step 1		< 0.01					0.43
	Constant		0.83	3.23		0.8
	HRV		-0.11	0.42	-0.07	0.79
Step 2		0.01					0.25
	Constant		1.69	4.25		0.71
	HRV		-0.13	0.44	-0.08	0.77
	Sleepiness		-0.08	0.29	-0.08	0.78
Model comparison						0.78	0.57
Orienting
Step 1		0.02					0.46
	Constant		1.64	2.49		0.52
	HRV		-0.16	0.32	-0.13	0.62
Step 2		0.02					0.25
	Constant		1.66	3.28		0.62
	HRV		-0.16	0.34	-0.13	0.63
	Sleepiness		< 0.01	0.22	-0.01	0.99
Model comparison						0.99	0.55
Conflict
Step 1		0.01					0.43
	Constant		6.5	5.21		0.23
	HRV		-0.17	0.68	-0.08	0.62
Step 2		0.02					0.26
	Constant		8.71	6.81		0.22
	HRV		-0.21	0.7	-0.08	0.76
	Sleepiness		-0.24	0.46	-0.14	0.61
Model comparison						0.61	0.61
Note: Only participants randomised to the sleep deprivation group are included models. Model comparisons assess Step 2 (ANT measure + Sleepiness) against Step 1 (ANT measure)
